16<sup>th</sup> February 2018

1

1  
2  
3  
4  
5  
6  
7  
8  
9  
10  
11  
12  
13  
14  
15  
16  
17  
18  
19  
20  
21  
22  
23  
24  
25  
26  
27  
28  
29  
30  
31

Cryo-EM structure of the adenosine A<sub>2A</sub> receptor coupled to an engineered heterotrimeric G protein

Javier García-Nafria<sup>#</sup>, Yang Lee<sup>#</sup>, Xiaochen Bai<sup>1</sup>, Byron Carpenter<sup>2</sup> & Christopher G. Tate\*

MRC Laboratory of Molecular Biology, Francis Crick Avenue, Cambridge CB2 0QH, UK

<sup>#</sup> These authors contributed equally to the work

1 Current address: University of Texas Southwestern Medical Center Dallas, Department of Biophysics, Dallas, TX 75390 USA

2 Current address: Warwick Integrative Synthetic Biology Centre, University of Warwick, UK

\* Corresponding author

Correspondence for the manuscript:

Dr. C.G. Tate

MRC Laboratory of Molecular Biology,  
Francis Crick Avenue,  
Cambridge CB2 0QH, UK

Email [cgt@mrc-lmb.cam.ac.uk](mailto:cgt@mrc-lmb.cam.ac.uk)

Telephone +44-(0)1223-267073

32

33 **Abstract**

34

35 The adenosine A<sub>2A</sub> receptor (A<sub>2A</sub>R) is a prototypical G protein-coupled receptor (GPCR) that  
36 couples to the heterotrimeric G protein G<sub>s</sub>. Here we determine the structure by electron cryo-  
37 microscopy (cryo-EM) of A<sub>2A</sub>R at pH 7.5 bound to the small molecule agonist NECA and  
38 coupled to an engineered heterotrimeric G protein, which contains mini-G<sub>s</sub>, the βγ subunits  
39 and nanobody Nb35. Most regions of the complex have a resolution of ~3.8 Å or better.  
40 Comparison with the 3.4 Å resolution crystal structure shows that the receptor and mini-G<sub>s</sub>  
41 are virtually identical and that the density of the side chains and ligand are of comparable  
42 quality. However, the cryo-EM density map also indicates regions that are flexible in  
43 comparison to the crystal structures, which unexpectedly includes regions in the ligand  
44 binding pocket. In addition, an interaction between intracellular loop 1 of the receptor and the  
45 β subunit of the G protein was observed.

46

47

## 48 **Introduction**

49

50 The adenosine A<sub>2A</sub> receptor (A<sub>2A</sub>R) is an archetypical Class A G protein-coupled  
51 receptor (GPCR)<sup>1</sup>. A<sub>2A</sub>R is activated by the endogenous agonist adenosine and plays a  
52 prominent role in cardiac function, the immune system and central nervous system, including  
53 the release of the major excitatory neurotransmitter glutamate<sup>2,3</sup>. Given the widespread tissue  
54 distribution and physiological relevance of A<sub>2A</sub>R, it is a validated drug target for many  
55 disorders<sup>4</sup>, including Parkinson's disease<sup>5</sup> and cancer<sup>6</sup>. A<sub>2A</sub>R is one of the most stable GPCRs  
56 and structures have been determined of A<sub>2A</sub>R in an inactive state bound to inverse agonists<sup>7-  
57 13</sup>, an active intermediate state bound to agonists<sup>14-16</sup> and the fully active state bound to an  
58 agonist and coupled to an engineered G protein, mini-G<sub>S</sub><sup>17</sup>. In addition, structure-based drug  
59 design has been applied to inactive state structures of A<sub>2A</sub>R to develop potent and subtype  
60 specific inverse agonists with novel scaffolds<sup>9</sup> and these are currently in clinical trials.  
61 Comparison of the structures has led to an understanding of the molecular determinants for  
62 an inverse agonist compared to an agonist<sup>15</sup>, the conformational changes induced by agonist  
63 binding to convert the inactive state to the active intermediate state<sup>18</sup>, and the role of the G  
64 protein in stabilising the fully active state<sup>17</sup>. The active state was determined by crystallizing  
65 the receptor coupled solely to mini-G<sub>S</sub>, an engineered G protein with eight point mutations  
66 and three deletions, including the whole of the  $\alpha$ -helical domain<sup>19</sup>. Although  
67 pharmacologically mini-G<sub>S</sub> recapitulates the ability of a heterotrimeric G protein to increase  
68 the affinity of agonist binding to the receptor<sup>17</sup>, the roles for the  $\beta\gamma$  subunits could not be  
69 described. In terms of the interactions between a heterotrimeric G protein and a Class A  
70 GPCR, the vast majority of interactions are made by the  $\alpha$  subunit, in particular the C-  
71 terminal  $\alpha 5$  helix<sup>20</sup>. However, there was an interaction between the  $\beta$  subunit and the  $\beta 2$ -  
72 adrenoceptor<sup>20</sup> and also between the  $\beta$  subunit and the class B receptors for calcitonin<sup>21</sup> and  
73 glucagon-like peptide<sup>22</sup>. In addition, there is mutagenesis data suggesting that the  $\alpha 2$ -  
74 adrenergic receptor directly interacts with the  $\beta$  subunit. We therefore determined the  
75 structure of A<sub>2A</sub>R coupled to an engineered heterotrimeric G protein.

76 There are now two choices in how to determine the structure of a GPCR coupled to a  
77 heterotrimeric G protein, which are X-ray crystallography and electron cryo-microscopy  
78 (cryo-EM). The disadvantage of X-ray crystallography lies in the difficulty of producing  
79 good quality crystals of a GPCR coupled to a heterotrimeric G protein. The only successful  
80 strategy so far has been to use lipidic cubic phase composed of the lipid MAG7:7 and to

81 crystallise a GPCR fusion protein with T4 lysozyme at the N-terminus, but there is only a  
82 single structure published to date<sup>20</sup>. The other option is to use cryo-EM and single particle  
83 reconstruction techniques. This is now possible given the recent developments in the field  
84 over the last few years<sup>23</sup> together with the improved contrast provided by the recently  
85 developed Volta phase plate (VPP)<sup>24</sup>, which enhances the probability of getting structural  
86 data of small proteins<sup>25</sup>. The structure determination of two Class B receptors coupled to G<sub>S</sub>  
87 at ~4 Å resolution shows the potential of this methodology<sup>21,22</sup>. We thus decided to use cryo-  
88 EM to determine the structure of A<sub>2A</sub>R coupled to an engineered heterotrimeric G protein.  
89 This would provide insights about the role of the β subunit in coupling to A<sub>2A</sub>R, but would  
90 also provide an opportunity to directly compare the structure of the receptor determined in  
91 the active state by X-ray crystallography and cryo-EM.

92

93

## 94 **Results**

95

### 96 **Preparation of an A<sub>2A</sub>R-G<sub>S</sub> complex**

97

98 In this work we used a construct of A<sub>2A</sub>R that contained thioredoxin at the N-terminus of the  
99 receptor<sup>26</sup>. This was originally designed with a rigid linker between the thioredoxin and the  
100 receptor to generate a large hydrophilic surface to A<sub>2A</sub>R to improve crystallisation, although  
101 this proved unsuccessful. The presence of thioredoxin did not significantly affect the  
102 pharmacology of A<sub>2A</sub>R, as assessed by determination of its apparent K<sub>D</sub> for the inverse  
103 agonist ZM241385 or in agonist shift assays (Figure 1). It could also be purified to  
104 homogeneity and coupled effectively to both mini-G<sub>S</sub><sup>26</sup> and to the heterotrimer containing  
105 mini-G<sub>S</sub>, β<sub>1</sub>, γ<sub>2</sub> and Nb35 (Figure 1). Detergent-solubilised A<sub>2A</sub>R coupled to the heterotrimer  
106 had a molecular weight (excluding the detergent micelle of LMNG) of approximately 130  
107 kDa<sup>26</sup>.

108

### 109 **The impact of the Volta Phase Plate on the cryo-EM A<sub>2A</sub>R-G-protein complex map**

110

111 Initial micrographs for the A<sub>2A</sub>R complex were collected on a FEI Titan Krios  
112 microscope using a K2 Summit detector in the absence of a Volta-potential phase plate (VPP)  
113 (Figure 2a). Data processing showed the characteristic 2D class averages of a GPCR coupled

114 to a heterotrimeric G protein (Figure 2a). After 3D classification and refinement, the best  
115 model (containing 72,486 particles) reached 6.7 Å resolution and showed clearly defined  $\alpha$ -  
116 helices in both the receptor and G protein (Figure 2a). We then collected data using the VPP  
117 on a FEI Titan Krios microscope using either a K2 Summit detector or a Falcon III detector  
118 in electron counting mode (Figures 2b and 2c). The K2 dataset consisted of micrographs  
119 pooled from different days and collected somehow heterogeneously regarding total dose and  
120 doses rates (see Methods for details), while the Falcon III dataset was collected in a single  
121 session over 48h. Both datasets were processed in an equivalent manner to the non-VPP data,  
122 with only few minor exceptions (see Methods). Since images collected with a VPP possess  
123 higher contrast (Figures 2b and 2c) the auto-picking feature in RELION that uses a Gaussian  
124 blob as a reference resulted in optimal particle picking without the need for specific ‘auto-  
125 picking’ references<sup>27</sup>. After 2D and 3D classification (see Methods for details), refinement  
126 yielded models with overall resolution of 4.88 Å and 4.45 Å for the K2 Summit and Falcon  
127 III detector respectively (Figure 2b and 2c). The Falcon III model was later improved to 4.11  
128 Å with further processing (see below) showing details for most amino acid side chains after B  
129 factor sharpening. The effect of the VPP for this particular dataset was therefore essential  
130 making ‘side-chain’ resolution accessible. A B factor plot (assessing the number of particles  
131 vs resolution) was used to assess the impact of the VPP (Figure 2e). It is observed that, in the  
132 presence of the VPP, the A<sub>2A</sub>R map not only has a better resolution for the same number of  
133 particles, but the B-factor improves significantly from 213 to 85 (when comparing K2  
134 Summit with and without VPP). This becomes essential when trying to reach high resolution  
135 information in a reasonable time scale (especially important for high throughput structure  
136 determination in drug discovery). As an example, to obtain the same resolution of 4.88 Å  
137 using the K2 Summit detector without the VPP, one would have needed about 5 million  
138 particles, that would require ~65 days of data collection at a Titan Krios electron microscope  
139 (in comparison to 145,169 particles collected in 48 hours with a VPP).

140 All cryo-EM grids were plunge-frozen from a single batch of A<sub>2A</sub>R–G protein complex  
141 and most of the duplicate grids were made in a single freezing session. Data collection was  
142 performed at higher magnification for the non-VPP data (magnification 200,000x and 0.66  
143 Å/pixel) than for the VPP dataset (1.14 Å/pixel and 1.07 Å/pixel for the K2 Summit and  
144 Falcon III detectors respectively), positioning the high-resolution information of the non-VPP  
145 data at a better location in the detector DQE range (Nyquist being 1.32 Å vs 2.14 Å/2.28 Å  
146 for the non-VPP vs the VPP K2/Falcon III respectively). The VPP resolution enhancement

147 therefore could potentially be higher if equivalent magnifications were used. Data processing  
148 was carried out as equivalent as possible for all datasets in order to make them comparable.  
149 We therefore believe that the comparison between the VPP and non-VPP datasets is as fair as  
150 possible, although if anything we are favouring the non-VPP data.

151 Comparisons of data with and without VPP had only been previously been published  
152 for samples that readily reached high resolution without VPP. Although in our experience the  
153 improvement is sample dependent, these data show the potential to which the VPP can be  
154 useful in certain cases and more comparisons will be needed in order to understand the  
155 variability in enhancement between samples. Although we see a significant difference  
156 between the K2 and Falcon III performance, data for the K2 with VPP was a result of  
157 merging data with different dose rates and total doses. We therefore do not have an  
158 absolutely identical comparison of the two detectors.

159

## 160 **Structure determination of the A<sub>2A</sub>R–G<sub>s</sub> complex**

161

162 The highest resolution data set corresponded to micrographs collected on a Falcon III  
163 detector in electron counting mode using a VPP, therefore this map was used for model  
164 building and subsequent analysis. Data collection parameters and processing are described in  
165 the Methods section. In summary, 837 movies were collected and corrected for stage drift,  
166 beam induced movement and dose weighting with MotionCor2. CTF fitting, defocus and  
167 phase estimation were performed with Gctf-v0.1.06<sup>28</sup>. Particle picking was performed using a  
168 Gaussian blob, as implemented by RELION<sup>29</sup> 2.0. 3D classification was performed with an  
169 *ab initio* model and refinement of the best classes with clear GPCR-like features (128,002  
170 particles) attained an overall resolution of 4.45 Å (using gold standard FSC of 0.143)<sup>30</sup>.  
171 Attempts to improve the model included further 3D classification, which revealed that around  
172 50% of the particles contained a heterogeneous  $\gamma$  subunit. However, the resolution and  
173 quality of the overall model suffered when removing these particles, so we therefore  
174 compromised on having poor quality density for the  $\gamma$  subunit, but having higher resolution  
175 for the rest of the complex.

176 In further attempts to improve the model, during refinement, the low-pass filter effect  
177 of the Wiener filter in the regularised likelihood optimisation algorithm was relaxed through  
178 the use of a regularisation parameter (T=5). This allowed the refinement algorithm to  
179 consider higher spatial frequencies in the alignment of the individual particles yielding a map

180 of higher quality. Nevertheless, both half-reconstructions were kept completely separately,  
181 and the final resolution estimate (at the post-processing stage in RELION) was based on the  
182 standard FSC between the two unfiltered half-reconstructions. Although resolution did not  
183 improve, the quality of the map improved noticeably.

184 Calculation of the local resolution in RELION showed that although the overall  
185 resolution was estimated to be 4.5 Å the core of the complex was ~3.8 Å with most of the  
186 map at 4.0 Å resolution or higher, with clearly visible density for the majority of amino acid  
187 side chains. As shown in Figure 3, the regions that showed poorer resolution were the  
188 thioredoxin and the detergent micelle (a significant fraction of the small complex), which  
189 hinders a realistic overall resolution estimation.

190 In order to accurately estimate the resolution of the A<sub>2A</sub>R complex map and to  
191 eliminate noise from refinement, the detergent micelle and thioredoxin moiety needed to be  
192 excluded. Excluding the micelle by simply tightening the mask did not yield optimal results  
193 with artefacts produced at the interface between the model and the mask. Such a strong signal  
194 might be specific to LMNG since, in our experience, the signal from other detergents can be  
195 masked out in this manner. We then decided to perform a double signal subtraction protocol  
196 where initial coordinates were used to create a tight mask around the protein component  
197 excluding thioredoxin (A<sub>2A</sub>R, mini-G<sub>S</sub>, β, γ, Nb35), which was then subtracted from the  
198 original particles. The resulting particles were used to produce an accurate map of the micelle  
199 and thioredoxin, which was then used to perform signal subtraction of the original particles,  
200 leaving them devoid of micelle or thioredoxin. Refinement of these particles yielded an  
201 improved map at 4.11 Å resolution. However, it appeared that the refinement process focused  
202 primarily on the intracellular G protein heterotrimer complex leaving a lower quality map at  
203 the receptor region. In order to circumvent this problem, we performed refinement with the  
204 original particles and then exchanging them for their signal subtracted equivalent (without  
205 micelle and thioredoxin) only in the last iteration of refinement. This resulted in the best  
206 overall map at 4.11 Å resolution with quality density throughout (Table 1).

207 Attempts to remove particles with low phase shift and poor contrast (~22,000 particles  
208 with <0.25π) decreased resolution and map quality. We therefore kept low phase shift data in  
209 the final model.

210  
211  
212  
213  
214

215 **Overall structure of the NECA-bound A<sub>2A</sub>R mini heterotrimeric G protein complex**

216

217 The A<sub>2A</sub>R cryo-EM complex structure provides insights into its structure in solution,  
218 in the absence of crystal contacts and at more physiological conditions (pH 7.5) than the X-  
219 ray structure (pH 5.7 or below for inactive structures). The density map of the A<sub>2A</sub>R–G  
220 protein heterotrimer displayed a local resolution varying from 3.3 Å to 6.4 Å (Figure 3). Side  
221 chain densities were observed for most amino acid residues, which were of similar quality to  
222 those in the X-ray crystallographic map of the A<sub>2A</sub>R–mini-G<sub>S</sub> structure (Figure 4). The lowest  
223 resolution was found at the C-terminus of the β subunit and most of the γ subunit, which had  
224 very poor density. Signal subtraction and 3D classification protocols have been used to  
225 isolate different protein conformations of small regions<sup>31</sup>. Upon implementation of these  
226 strategies, we did not find any other discrete conformations of the heterotrimeric G protein,  
227 suggesting that the C-terminus of the β subunit and most of the γ subunit region are flexible.  
228 Within the cryo-EM structure of A<sub>2A</sub>R there are two regions that lack density and are  
229 therefore also probably disordered and flexible, namely the N-terminal section of ECL2  
230 (G147 to Q163) and the whole of ICL3 (E212 to S223). These regions are ordered in some  
231 crystal structures, but this usually correlates with these regions forming lattice contacts.  
232 Sections of the cryo-EM density map for which there is poor quality density and high B-  
233 factors of the refined coordinates (Figure 3 and Figure 3 – Figure Supplement 1) include  
234 TM1, helix 8, the second section of ECL2 that contributes relevant residues for ligand  
235 binding (see below), ECL1 and ECL3.

236 The overall architecture of the A<sub>2A</sub>R–heterotrimeric G protein complex is similar to  
237 the heterotrimeric G<sub>S</sub>-coupled complexes for the β<sub>2</sub>-adrenergic receptor<sup>20</sup>, GLP1<sup>22</sup> and the  
238 calcitonin receptor<sup>21</sup>. The receptor and mini-G<sub>S</sub> portions of the A<sub>2A</sub>R–G protein complex are  
239 very similar to the crystal structure of the A<sub>2A</sub>R–mini-G<sub>S</sub> complex, with the RMSD of C<sub>α</sub>  
240 atoms for the receptor and mini-G<sub>S</sub> components being 0.5 Å and 0.6 Å, respectively. The  
241 largest differences are found at the interface between mini-G<sub>S</sub> and the β subunit, which have  
242 a different conformation when βγ is bound. This may contribute to a minor difference in  
243 curvature of the α5 helix in mini-G<sub>S</sub> when it is in the heterotrimer complex compared to  
244 when it is bound to the receptor alone (Figure 5). However, this does not have any major  
245 impact on the interface between the receptor and mini-G<sub>S</sub>, thus further validating the use of  
246 mini G proteins as a surrogate for G protein heterotrimers<sup>17,19,26</sup>.

247



## 248 **Cryo-EM map at the ligand binding pocket**

249

250 The structure of A<sub>2A</sub>R orthosteric binding pocket is described by two crystal  
251 structures of A<sub>2A</sub>R bound to NECA, with one structure of A<sub>2A</sub>R in an active intermediate  
252 conformation (PDB code 2ydv)<sup>15</sup> and the other structure in the active state coupled to mini-  
253 G<sub>s</sub> (PDB code 5g53)<sup>17</sup>. The extracellular half of A<sub>2A</sub>R does not undergo any major structural  
254 changes in the transition from the active intermediate to the mini-G<sub>s</sub> coupled active state,  
255 with the volume of the binding pocket remaining constant and the interactions to NECA  
256 being identical<sup>17</sup>. The orthosteric binding site in the cryo-EM map has well defined density  
257 although the map has slightly lower resolution towards the extracellular surface. The density  
258 for NECA is of sufficient quality to allow an unambiguous orientation of NECA and the  
259 same interactions to the receptor are observed as present in the crystal structures (Figure 4  
260 and Figure 5).

261 Despite the similarities between the orthosteric binding site observed in the cryo-EM  
262 and X-ray structures, small differences were found in ECL2 that forms part of the binding  
263 pocket. The C-terminal half of ECL2 in the X-ray structures forms a helical turn that caps the  
264 pocket and contributes side chains that interact with NECA (Phe168 and Glu169). In the  
265 cryo-EM structure this region is more disordered. As a consequence, there is no significant  
266 side chain density for Phe168 and Glu169 in the cryo-EM map. The fact that there is clear  
267 density for NECA and His264 excludes the possibility that the whole of this region has poor  
268 resolution *i.e.* the extracellular portion of the receptor is not moving as a rigid body. This is  
269 consistent with ECL2 being dynamic.

270 A second difference between the NECA-bound X-ray structures and the cryo-EM  
271 structure is the absence of an interaction between Glu169 and His264. This ionic bridge  
272 affects small molecule binding kinetics and in most of the crystal structures caps the binding  
273 pocket. In the cryo-EM structure, the imidazole group of His264 is pointing away from the  
274 orthosteric binding pocket, and it is too far away from Glu169 to form a salt bridge (Figure  
275 5). This might be a consequence of the pH in which the respective structures were  
276 determined. The pK<sub>a</sub> of the histidine side chain is ~6 and most crystal structures have been  
277 obtained at lower pH (~pH 5), favouring protonation of His264 and the formation of the ionic  
278 bridge. At a more physiological pH of 7.5 that was used for the cryo-EM structure, His264  
279 would be predominantly deprotonated and unable to form the ionic bridge. Indeed, crystal  
280 structures obtained at higher pH, such as the complexes with caffeine, XAC and ZM241385  
281 (~pH 8), all show a broken ionic bridge. Therefore, it is likely that in the physiological state

282 (represented by the cryo-EM map) this ionic bridge is absent, unless the surrounding pH is  
283 momentarily lowered for specific functions (e.g. the release of high concentrations of  
284 glutamate in glutamatergic synapses).

285

## 286 **Comparison of the G protein–receptor interface between the crystal and cryo-EM** 287 **structures**

288

289 The interface between mini-G<sub>S</sub> in the heterotrimeric G protein and A<sub>2A</sub>R in the cryo-  
290 EM structure is very similar to the interface between mini-G<sub>S</sub> and A<sub>2A</sub>R in the X-ray structure  
291 (PDB code 5g53). The interface in the cryo-EM structure has a buried surface of 1135 Å<sup>2</sup>  
292 compared to 1048 Å<sup>2</sup> for the X-ray structure 5g53; the slight increase is due to interactions  
293 between ICL1 of A<sub>2A</sub>R (residues Leu110 and Asn113) and the N-terminal helix of mini-G<sub>S</sub>  
294 (residues His 41 and Arg38). The near full length N-terminal helix was present in the mini-  
295 G<sub>S</sub> construct in the cryo-EM structure, because this is required for the stable interaction  
296 between the α subunit and the βγ subunits, whereas it was truncated and disordered in the X-  
297 ray structure. The main interactions between A<sub>2A</sub>R and mini-G<sub>S</sub> in both the cryo-EM and X-  
298 ray structures are made predominantly by the C-terminal α5 helix in mini-G<sub>S</sub> and amino acid  
299 residues in H3, H5, H6, H7, H8 and ICL2 of A<sub>2A</sub>R<sup>17</sup>. The amino acid residues that make  
300 these interactions are identical, but the rotamers sometimes differ between the cryo-EM and  
301 X-ray structures. This may be a reflection of the different chemical environments in which  
302 the structures were determined or the slight difference in curvature of the α5 helix in mini-  
303 G<sub>S</sub>. In addition, some interactions may be transient and are captured in one structure and not  
304 another. For example, Arg291 at the intracellular end of H7 of A<sub>2A</sub>R adopts a different  
305 conformation in the cryo-EM structure compared to the crystal structure. This results in the  
306 absence of interactions between the Arg291 side chain and mini-G<sub>S</sub>, although the backbone  
307 carbonyl can still makes potential interactions with Glu392 and the adjacent residues in H8  
308 are still sufficiently close to mini-G<sub>S</sub> to make interactions.

309 The major difference between the structure determined by cryo-EM of the A<sub>2A</sub>R-  
310 heterotrimeric G protein complex and the X-ray structure of the A<sub>2A</sub>R-mini-G<sub>S</sub> complex was  
311 the presence of the βγ subunit in the cryo-EM structure. No interactions were observed  
312 between A<sub>2A</sub>R and the γ subunit, but potential interactions were observed between ICL1  
313 (residues Ser35, Asn36 and Gln38) of A<sub>2A</sub>R and the β subunit (Arg52, Asp312, Asp333 and  
314 Phe335). This interface between A<sub>2A</sub>R and the β subunit is considerably more extensive than

315 that observed in the  $\beta_2$ AR complex (Figure 6). However ICL1 shows higher B-factors than  
316 the rest of the  $A_{2A}$ AR cryo-EM structure, which may suggest that the interaction is fairly weak.  
317

## 318 **Discussion**

319  
320 The structure determination of  $A_{2A}$ AR in complex with mini- $G_s$ ,  $\beta$ ,  $\gamma$  and Nb35 at a  
321 physiologically relevant pH has highlighted a number of differences to the structure  
322 determined by X-ray crystallography of  $A_{2A}$ AR coupled to mini- $G_s$ <sup>17</sup>. Firstly, contacts between  
323  $A_{2A}$ AR and the heterotrimeric G protein were identified between ICL1 and the  $\beta$  subunit, and  
324 between ICL2 and part of the N-terminal  $\alpha$ -helix of the  $\alpha$  subunit; these regions of the G  
325 protein were either absent or disordered, respectively, in the crystal structure. Secondly, the  
326 difference in pH under which the cryo-EM structure was determined (pH 7.5) compared to  
327 many X-ray structures (pH <6) led to ECL2 being more dynamic, as the potential salt bridge  
328 between His264 and Glu169 was absent, and consequently Phe168 was disordered. The  
329 implications of these observations are discussed more below.

330 There are now two Class A receptors whose structures have been determined coupled  
331 to heterotrimeric  $G_s$ ,  $\beta_2$ AR<sup>20</sup> and  $A_{2A}$ AR, and after this work was completed, two Class B  
332 structures coupled to  $G_s$  were also published<sup>21,22</sup>. As expected the overall architecture of the  
333 receptors coupled to  $G_s$  are conserved, but the details differ. The biggest difference between  
334 coupling of Class A receptors to Class B receptors is that the position of H8 in the Class B  
335 receptors is angled towards the G protein by  $\sim 30^\circ$  compared to the Class A receptors. This  
336 results in extensive contacts between H8 and the G protein  $\beta$  subunit that are absent in Class  
337 A receptors. All the receptor structures coupled to  $G_s$  show the majority of the contacts  
338 between the  $\alpha 5$  helix of the  $\alpha$  subunit and H3, H5 and H6 of the receptor, with receptor-  
339 dependent contacts in H2, H7 and H8. The differences may arise partially from the subtle  
340 difference in bending of the C-terminal part of the  $\alpha 5$  helix and the different positions of the  
341  $\alpha 5$  helix within the receptor, both presumably arising from the different amino acid  
342 sequences of the respective receptors. The interactions observed here between  $A_{2A}$ AR and the  
343  $\beta$  subunit are also observed in the Class B receptors, but are absent from the crystal structure  
344 of the  $\beta_2$ AR- $G_s$  structure, although a shift of the  $\beta$  subunit by only a few  $\text{\AA}$ stroms would be  
345 sufficient for interactions to occur.

346 The poor density of ECL2 in the cryo-EM map of  $A_{2A}$ AR coupled to the heterotrimeric  
347 G protein, suggests that this region is more dynamic than suggested from the X-ray

348 structures, probably due to a combination of pH effects and the lack of the salt bridge  
349 between His264 and Glu169. This salt bridge has been suggested to be highly important in  
350 modulating the kinetics of ligand binding<sup>12</sup>. Interestingly, a recent structure<sup>13</sup> of A<sub>2A</sub>R bound  
351 to compound-1 was crystallised at pH 6.5, and no crystal contacts were formed by ECL2. In  
352 this structure, the N-terminal section of ECL2 lacked density as we observed in the cryo-EM  
353 map and, in the latter region, Phe168 adopts two conformations. In one conformation Phe168  
354 stacks against the ligand and in the other conformation Phe168 points towards the  
355 extracellular surface (Figure 5). The ionic bridge between Glu169 and His264 seems to be  
356 present in this structure, so the two conformations of Phe168 may be a consequence of the  
357 ligand. The cryo-EM structure thus adds support to the contention that ECL2 is flexible and  
358 may be important in modulating the accessibility of the orthosteric binding site to ligands.

359         The cryo-EM structure presented here allows for the first time a direct comparison of  
360 the structure of a GPCR bound to an identical ligand in the same conformation as determined  
361 by cryo-EM and X-ray crystallography. This is highly interesting with respect to drug  
362 discovery where tractability and speed of the structure determination are balanced by the  
363 resolution required for a particular aspect of any given project. Cryo-EM offers a relatively  
364 fast route to the structure of a GPCR in an active conformation coupled to the heterotrimeric  
365 G protein G<sub>s</sub>. The quality of the cryo-EM map was very similar to the electron density map  
366 from the X-ray structure, despite the reported resolutions being 4.1 Å and 3.4 Å respectively.  
367 In both cases, the ligand density was unambiguous, but adenosine is an asymmetric molecule  
368 and difficulties would have been encountered if the ligand was more symmetrical, such as  
369 caffeine. However, there is no doubt that cryo-EM is preferred in terms of overall speed;  
370 extensive protein engineering is required to obtain crystals of GPCRs<sup>32</sup>, through adding  
371 fusion proteins, deletions of flexible regions, removal of post-translational modifications and  
372 thermostabilisation. In theory, none of these modifications will be required for a cryo-EM  
373 structure, particularly as mild detergents, amphipols and nanodiscs are all compatible with  
374 structure determination of membrane proteins by cryo-EM and will maintain often quite  
375 unstable membrane proteins in a functional state<sup>33</sup>. However, once a crystal structure has  
376 been determined, they can often attain much higher resolution than structures of membrane  
377 proteins obtained so far, although high resolution cryo-EM structures are possible from single  
378 molecule imaging<sup>34</sup>. Another current advantage of X-ray crystallography is the possibility of  
379 soaking crystals to get multiple structures of a receptor bound to different ligands through  
380 molecular replacement<sup>35</sup>. Finally, there is still a size limitation of the molecule imaged by  
381 cryo-EM for structure determination<sup>36</sup> and experimentally this is now at about 65 kDa<sup>25</sup>.

382 However, given the continued drive towards improving the technology of cryo-EM, there is  
383 no doubt that this technique will play a pivotal role in structure-based drug design in future  
384 years<sup>37</sup>.

385

## 386 **Materials and Methods**

387

388 **Expression and purification of the human adenosine A<sub>2A</sub> receptor.** Construction of the  
389 thioredoxin-A<sub>2A</sub>R fusion protein and C-terminally truncated A<sub>2A</sub>R (1-317), both containing  
390 the N154A mutation, is described elsewhere<sup>26</sup>. The constructs were expressed using the  
391 baculovirus expression system as described previously<sup>17,38</sup>. Cells were harvested by  
392 centrifugation 72 hours post infection, resuspended in hypotonic buffer (20 mM HEPES pH  
393 7.5, 1 mM EDTA, 1 mM PMSF, cOmplete<sup>TM</sup> (Roche) protease inhibitor cocktail), flash-  
394 frozen in liquid nitrogen and stored at -80°C until use. The purification of the thioredoxin-  
395 A<sub>2A</sub>R fusion protein was performed in the detergent LMNG in the presence of 100 μM  
396 NECA using Ni<sup>2+</sup>-affinity chromatography followed by SEC as described previously<sup>17,38</sup>.

397

398 **Preparation of mini-G<sub>s</sub> heterotrimer.** The mini-G<sub>s</sub> construct (399) used in single particle  
399 cryo-EM reconstructions is based on the construct 393 that was used in the structure  
400 determination of the A<sub>2A</sub>R- mini-G<sub>s</sub> crystal structure<sup>17,19</sup>. However, unlike construct 393,  
401 mini-G<sub>s</sub>399 binds βγ<sup>26</sup>. The expression and purification of the respective components and  
402 assembly to make the complex containing mini-G<sub>s</sub>-β<sub>1</sub>γ<sub>2</sub>, and the preparation of nanobody  
403 Nb35, were all performed following the protocols described previously<sup>19,20,39</sup>.

404

405 **Preparation of the A<sub>2A</sub>R-mini-G<sub>s</sub>β<sub>1</sub>γ<sub>2</sub>-Nb35 complex.** Thioredoxin-A<sub>2A</sub>R, mini-G<sub>s</sub>-β<sub>1</sub>γ<sub>2</sub>  
406 and Nb35 were mixed in a molar ratio of 1:2:4, to yield a final thioredoxin-A<sub>2A</sub>R  
407 concentration of 1 mg/ml. 0.1 U of apyrase was added and the mixture was incubated  
408 overnight at 4°C. Excess G protein and nanobody were removed by SEC on a Superdex 200  
409 Increase column (running buffer 20 mM HEPES pH 7.5, 100 mM NaCl, 0.1% LMNG, 100  
410 μM NECA). Peak fractions with an absorbance value at 280 nm of 1.5-2 were used  
411 immediately for grid preparation or flash frozen in liquid nitrogen and stored at -80°C until  
412 use.

413

414 **Radioligand binding assays.** Insect cells expressing A<sub>2A</sub>R were resuspended in 1 ml of  
415 assay buffer (25 mM HEPES pH 7.5, 100 mM KCl, 1 mM MgCl<sub>2</sub>, protease inhibitor cocktail)  
416 at a final concentration of 3 x 10<sup>6</sup> cells/ml. Cells were sheared by 10 passages through a bent  
417 26G syringe needle. Cell membranes were diluted 50-fold to 100-fold in assay buffer and  
418 aliquots prepared as appropriate. In saturation binding assays, cell membranes containing  
419 A<sub>2A</sub>R were incubated with <sup>3</sup>H-ZM241385 (0.1 - 40 nM) for 2 h at 21°C. Non-specific binding  
420 was determined in the presence of 10 μM unlabelled ZM241385. In competition binding  
421 assays, cell membranes were incubated with NECA (1 nM - 1 μM) for 2 h at 21°C, in the  
422 presence or absence of 25 μM mini-G<sub>S</sub>393. 5 nM <sup>3</sup>H-ZM241385 was added followed by a 2 h  
423 incubation. Assays were terminated by filtering through PEI-treated 96-well glass fibre GF/B  
424 filter plates (Merck Millipore) and washing with ice-cold assay buffer. Filters were dried,  
425 placed into scintillation vials and incubated overnight in 4 ml Ultima Gold scintillant (Perkin  
426 Elmer). Radioactivity was quantified by scintillation counting using a Tri-Carb counter  
427 (Perkin Elmer). Apparent K<sub>D</sub> and apparent K<sub>i</sub> values were determined using GraphPad Prism  
428 version 6.0 (GraphPad Software, San Diego, CA).

429

430

431 **Cryo-EM grid preparation and data collection.** Cryo-EM grids were prepared by applying  
432 3 μl of sample (total protein concentration 1 mg/ml) on glow discharged holey gold grids  
433 (Quantifoil Au 1.2/1.3 300 mesh). Excess sample was removed by blotting with filter paper  
434 for 4-5 seconds prior to plunge-freezing in liquid ethane using a FEI Vitrobot Mark IV at  
435 100% humidity and 4°C. In all cases data was collected on a FEI Titan Krios microscope at  
436 300kV. Data without VPP and initial VPP images were acquired using a Gatan K2-Summit  
437 detector and a GIF-quantum energy filter (Gatan) with a 20 eV slit and zero loss mode to  
438 remove inelastic scattering. For the initial non-VPP dataset, EPU automatic data collection  
439 software (FEI) was used while the VPP data set of the K2-summit detector was collected  
440 using SerialEM automatic data collection software<sup>40</sup>.

441 The non-VPP data set contained a total of 2800 micrographs, collected as 40 movie  
442 frames at a dose rate of 2 e<sup>-</sup>/pixel/sec (1.25 e<sup>-</sup>/Å<sup>2</sup> per frame) for 10 seconds, with a total  
443 accumulated dose of 50 e<sup>-</sup>/Å<sup>2</sup>. The magnification was 200,000x yielding 0.66 Å/pixel at the  
444 specimen level.

445 The K2-VPP dataset was the result of merging three datasets with slightly different  
446 collection parameters: (a) 213 micrographs collected as 40 movie frames at 5.2 e<sup>-</sup>/pixel/sec  
447 over 10 seconds for a total dose of 40 e<sup>-</sup>/Å<sup>2</sup>; (b) 232 micrographs collected as 23 frames at 9

448 e<sup>-</sup>/pixel/sec over 4.6 seconds for a total accumulated dose of 30 e<sup>-</sup>/Å<sup>2</sup>; (c) 461 micrographs  
449 collected as 30 movie frames at a dose rate of 6 e<sup>-</sup>/pixel/sec over 6.5 seconds for a total dose  
450 of 30 e<sup>-</sup>/Å<sup>2</sup>. In all cases the magnification was set to obtain a pixel size of 1.14 Å. The last  
451 data set was acquired using a Falcon III detector in electron counting mode by recording 75  
452 movie frames (0.8 seconds per frame) at a dose rate of 0.5 e<sup>-</sup>/pixel/sec (0.4 e<sup>-</sup>/Å<sup>2</sup> per frame)  
453 for a total accumulated dose of 30 e<sup>-</sup>/Å<sup>2</sup> acquired over a period of 60 seconds. Pixel size at  
454 the specimen was calibrated to be 1.07 Å. A total of 827 images were incorporated into the  
455 dataset.

456

### 457 **Data processing and model building**

458

459 All data processing was performed using RELION-2<sup>41</sup>. Good quality images were  
460 selected manually and drift correction, beam induced motion and dose weighting was  
461 performed for each of the datasets with MotionCor2<sup>42</sup>, using 5 x 5 patches and the  
462 corresponding dose per frame. CTF fitting and phase shift estimation were performed using  
463 Gctf-v0.1.06<sup>28</sup>. In all cases, auto-picking<sup>43</sup> was performed with a Gaussian blob as a  
464 template<sup>27</sup>. Elimination of false positives or “bad particles” was performed over two rounds  
465 of reference-free 2D classification. 10,000 random particles were used for *ab initio* model  
466 generation using the Stochastic Deepest Descent (SDG) algorithm incorporated in RELION-  
467 2.1. The resulting model was used as input for the initial 3D classification. After a single  
468 round of 3D classification, particles in quality models were pooled together for refinement.  
469 The FalconIII-VPP data was divided into three classes, where two of them presented clear  
470 structural features resembling a GPCR-G-protein heterotrimer complex. During refinement of  
471 the Falcon III + VPP data, the low-pass filter effect of the Wiener filter in the regularised  
472 likelihood optimisation algorithm was relaxed through the use of a regularisation parameter  
473 (T=5). This allowed the refinement algorithm to consider higher spatial frequencies in the  
474 alignment of the individual particles yielding a map of higher quality. Nevertheless, both  
475 half-reconstructions were kept completely separately, and the final resolution estimate (at the  
476 post-processing stage in RELION) was based on the standard FSC between the two unfiltered  
477 half-reconstructions. Signal subtraction of the micelle was performed as described in the  
478 results section and were used only in the last iteration of refinement. Application of ‘particle  
479 polishing’ in RELION (corrects for beam induced motion and performs experimental dose-  
480 weighting) did not improve the quality of the density.

481 Model building and refinement was carried out using the CCP-EM software suite<sup>44</sup>.  
482 The activated A<sub>2A</sub>R and mini-G<sub>s</sub> coordinates were taken as starting models (PDB code 5g53)  
483 together with the βγ coordinated from the β<sub>2</sub>AR complex structure<sup>20</sup>. Jelly-body refinement  
484 was performed in Refmac5<sup>45</sup> followed by manual modification and real space refinement in  
485 Coot<sup>46</sup>. Refinement with restraints (generated in ProSMART<sup>47</sup>) was performed in Refmac5 in  
486 order to maintain the secondary structure in regions with poorer map quality.

487

## 488 **Acknowledgements**

489 This work was funded by a grant from the European Research Council (EMPSI 339995)  
490 Heptares Therapeutics Ltd, Pfizer and core funding from the Medical Research Council  
491 [MRC U105197215]. We thank Rishi Matadeen and Kasim Sader for their help with cryo-  
492 EM data collection, Christos Savva for his help in using the VPP and Wim Hagen for the  
493 SerialEM single-particle data collection script. We also thank Rafael Fernandez-Leiro, Sjors  
494 Scheres and Paula da Fonseca for useful discussions.

## 495 **Author Contributions**

496 J.G-N. made cryo-EM grids, performed data collection and determined the structure. Y.L.  
497 performed pharmacological assays, purified A<sub>2A</sub>R and βγ, purified receptor G protein  
498 complexes, made cryo-EM grids, collected cryo-EM data, and performed processing of  
499 images. B.C. purified Nb35 and mini-G<sub>s</sub>. X.B. performed initial data collection and image  
500 processing. C.G.T. managed the project, performed data interpretation and wrote the  
501 manuscript. All authors contributed towards the final version of the manuscript.

502

## 503 **Competing financial interests**

504 CGT is a consultant and shareholder of Heptares Therapeutics, and they also funded this  
505 work.

506

## 507 **Materials and correspondence**

508 Correspondence and all requests for materials should be addressed to CGT

509

510

511



## 512 **Figure legends**

513

514 **Figure 1 Pharmacological analyses of A<sub>2A</sub>R.** **a**, Saturation binding of the inverse agonist  
515 <sup>3</sup>H-ZM241385 to A<sub>2A</sub>R constructs gave the following apparent K<sub>D</sub>s: A<sub>2A</sub>R (circles), 0.5 ± 0.1  
516 nM; TrxA-A<sub>2A</sub>R (squares), 0.8 ± 0.2 nM. **b**, Competition binding curves measuring the  
517 displacement of <sup>3</sup>H-ZM241385 with increasing concentrations of NECA gave the following  
518 K<sub>i</sub>s for NECA; A<sub>2A</sub>R (filled circles), 1.0 ± 0.5 μM; A<sub>2A</sub>R + mini-G<sub>s</sub> (open circles, dashed  
519 line), 2.6 ± 1.8 nM; TrxA-A<sub>2A</sub>R (filled squares), 1.1 ± 0.4 μM; TrxA-A<sub>2A</sub>R + mini-G<sub>s</sub> (open  
520 squares, dashed line), 1.8 ± 1.2 nM. Data are the average from two independent experiments  
521 performed in duplicate and errors represent the SEM.

522

523 **Figure 2. Cryo-EM of the A<sub>2A</sub>R complex in the presence and absence of a VPP.** **a-c**, Each  
524 panel contains three sections, with the left-hand section showing a representative micrograph  
525 obtained on a Titan Krios, the central section depicting 2D class averages and the right-hand  
526 section the refined 3D reconstruction obtained from the data collected. **a**, Data collected  
527 without using a VPP on a K2 Summit detector. **b**, Data collected using a VPP on a K2  
528 Summit detector. **c**, Data collected using a VPP on a Falcon III detector in electron counting  
529 (EC) mode. **d**, Gold-standard FSC curves for the three 3D reconstructions with resolutions  
530 estimated at 0.143. **e**, Difference in B-factors between the three datasets.

531

532 **Figure 3. Local resolution cryo-EM map.** **a**, Local resolution map of the Falcon III + VPP  
533 model prior to refinement with signal subtracted particles as calculated with RELION. **b**,  
534 Local resolution of the same model after refinement of signal subtracted particles (also  
535 calculated with RELION) **c**, A<sub>2A</sub>R complex displayed as putty cartoons, where B-factor of  
536 the coordinates relates to the thickness of the tube.

537

538 **Figure 4. Comparison of map densities from the cryo-EM data and X-ray diffraction**  
539 **data.** The structure of the A<sub>2A</sub>R–heterotrimeric G protein complex determined by cryo-EM is  
540 depicted as a cartoon. The four panels show regions of the structure and the associated  
541 density maps from the cryo-EM data and, where present, electron density (2Fo-Fc) from the  
542 X-ray structure of the A<sub>2A</sub>R–mini-G<sub>s</sub> (PDB code 5g53). Densities for the maps shown in the  
543 panels were sharpened using the following B factors (resolution of filtering in parentheses): β  
544 subunit and A<sub>2A</sub>R, -170 Å<sup>2</sup> (3.7 Å); mini-G<sub>s</sub>–A<sub>2A</sub>R interface, 130 Å<sup>2</sup> (3.7 Å); NECA, -130

545 Å<sup>2</sup> (4.1 Å).

546

547 **Figure 5. Structure of A<sub>2A</sub>R–heterotrimeric G<sub>s</sub>.** **a**, Superposition of A<sub>2A</sub>R (pale green)  
548 coupled to mini-G<sub>s</sub> (pale blue) with A<sub>2A</sub>R (dark green) coupled to mini-G<sub>s</sub> dark blue), βγ  
549 (red) and Nb35 (yellow). **b**, Superposition of NECA bound to A<sub>2A</sub>R in the cryo-EM and X-  
550 ray structures after alignment of A<sub>2A</sub>R (PyMol). **c**, The position of His264 in the cryo-EM  
551 structure (dark green, density shown by black mesh), differs from its position in the X-ray  
552 structure (light green). No density is observed for the side chain of Glu269 in the cryo-EM  
553 structure, but when modelled it would be too far away to make a contact with His264. **d**, The  
554 interface between ICL1 of A<sub>2A</sub>R (dark green) and the β subunit (red) is depicted, with density  
555 shown as a black mesh.

556

557 **Figure 6. Comparison of A<sub>2A</sub>R and β<sub>2</sub>AR coupled to heterotrimeric G<sub>s</sub>.** **a**, A<sub>2A</sub>R (dark  
558 green) and β<sub>2</sub>AR (dark grey) were aligned using regions of the receptors predicted to be  
559 within the cytoplasmic leaflet of the lipid bilayer. The position of mini-G<sub>s</sub> (pale green)  
560 coupled to A<sub>2A</sub>R is compared to the position of the GTPase domain of the α subunit (pale  
561 grey) coupled to β<sub>2</sub>AR. The βγ subunits and Nb35 have been omitted for clarity. **b**,  
562 Transmembrane region H1 and ECL1 in A<sub>2A</sub>R (dark green) extends closer to the β subunit  
563 (pale green) whereas β<sub>2</sub>AR (dark grey) is too far away from the β subunit (pale grey) to make  
564 extensive contacts.

565

566 **Table 1. Data collection and refinement statistics.**

567

568

## 569 References

570

- 571 1 Venkatakrisnan, A. J. *et al.* Molecular signatures of G-protein-coupled receptors.  
572 *Nature* **494**, 185-194, doi:10.1038/nature11896 (2013).
- 573 2 Fredholm, B. B., AP, I. J., Jacobson, K. A., Klotz, K. N. & Linden, J. International  
574 Union of Pharmacology. XXV. Nomenclature and classification of adenosine  
575 receptors. *Pharmacological reviews* **53**, 527-552 (2001).
- 576 3 Fredholm, B. B., AP, I. J., Jacobson, K. A., Linden, J. & Muller, C. E. International  
577 Union of Basic and Clinical Pharmacology. LXXXI. Nomenclature and classification  
578 of adenosine receptors--an update. *Pharmacological reviews* **63**, 1-34,  
579 doi:10.1124/pr.110.003285 (2011).
- 580 4 de Lera Ruiz, M., Lim, Y. H. & Zheng, J. Adenosine A2A receptor as a drug  
581 discovery target. *J Med Chem* **57**, 3623-3650, doi:10.1021/jm4011669 (2014).
- 582 5 Hickey, P. & Stacy, M. Adenosine A2A antagonists in Parkinson's disease: what's  
583 next? *Curr Neurol Neurosci Rep* **12**, 376-385, doi:10.1007/s11910-012-0279-2  
584 (2012).
- 585 6 Leone, R. D., Lo, Y. C. & Powell, J. D. A2aR antagonists: Next generation  
586 checkpoint blockade for cancer immunotherapy. *Comput Struct Biotechnol J* **13**, 265-  
587 272, doi:10.1016/j.csbj.2015.03.008 (2015).
- 588 7 Dore, A. S. *et al.* Structure of the adenosine A(2A) receptor in complex with  
589 ZM241385 and the xanthines XAC and caffeine. *Structure* **19**, 1283-1293,  
590 doi:10.1016/j.str.2011.06.014 (2011).
- 591 8 Jaakola, V. P. *et al.* The 2.6 angstrom crystal structure of a human A2A adenosine  
592 receptor bound to an antagonist. *Science* **322**, 1211-1217, doi:1164772 [pii]  
593 10.1126/science.1164772 (2008).
- 594 9 Congreve, M. *et al.* Discovery of 1,2,4-triazine derivatives as adenosine A(2A)  
595 antagonists using structure based drug design. *Journal of medicinal chemistry* **55**,  
596 1898-1903, doi:10.1021/jm201376w (2012).
- 597 10 Hino, T. *et al.* G-protein-coupled receptor inactivation by an allosteric inverse-agonist  
598 antibody. *Nature* **482**, 237-240, doi:10.1038/nature10750 (2012).
- 599 11 Liu, W. *et al.* Structural basis for allosteric regulation of GPCRs by sodium ions.  
600 *Science* **337**, 232-236, doi:10.1126/science.1219218 (2012).
- 601 12 Segala, E. *et al.* Controlling the Dissociation of Ligands from the Adenosine A2A  
602 Receptor through Modulation of Salt Bridge Strength. *J Med Chem* **59**, 6470-6479,  
603 doi:10.1021/acs.jmedchem.6b00653 (2016).
- 604 13 Sun, B. *et al.* Crystal structure of the adenosine A2A receptor bound to an antagonist  
605 reveals a potential allosteric pocket. *Proc Natl Acad Sci U S A* **114**, 2066-2071,  
606 doi:10.1073/pnas.1621423114 (2017).
- 607 14 Lebon, G., Edwards, P. C., Leslie, A. G. & Tate, C. G. Molecular Determinants of  
608 CGS21680 Binding to the Human Adenosine A2A Receptor. *Mol Pharmacol* **87**, 907-  
609 915, doi:10.1124/mol.114.097360 (2015).
- 610 15 Lebon, G. *et al.* Agonist-bound adenosine A2A receptor structures reveal common  
611 features of GPCR activation. *Nature* **474**, 521-525, doi:10.1038/nature10136 (2011).
- 612 16 Xu, F. *et al.* Structure of an agonist-bound human A2A adenosine receptor. *Science*  
613 **332**, 322-327, doi:10.1126/science.1202793 (2011).
- 614 17 Carpenter, B., Nehme, R., Warne, T., Leslie, A. G. & Tate, C. G. Structure of the  
615 adenosine A(2A) receptor bound to an engineered G protein. *Nature* **536**, 104-107,  
616 doi:10.1038/nature18966 (2016).

- 617 18 Lebon, G., Warne, T. & Tate, C. G. Agonist-bound structures of G protein-coupled  
618 receptors. *Curr Opin Struct Biol*, doi:10.1016/j.sbi.2012.03.007 (2012).
- 619 19 Carpenter, B. & Tate, C. G. Engineering a minimal G Protein to facilitate  
620 crystallisation of G protein coupled receptors in their active conformation. *Protein*  
621 *Eng. Design Sel.* **29**, 583-593 (2016).
- 622 20 Rasmussen, S. G. *et al.* Crystal structure of the beta2 adrenergic receptor-Gs protein  
623 complex. *Nature* **477**, 549-555, doi:10.1038/nature10361 (2011).
- 624 21 Liang, Y. L. *et al.* Phase-plate cryo-EM structure of a class B GPCR-G-protein  
625 complex. *Nature* **546**, 118-123, doi:10.1038/nature22327 (2017).
- 626 22 Zhang, Y. *et al.* Cryo-EM structure of the activated GLP-1 receptor in complex with a  
627 G protein. *Nature* **546**, 248-253, doi:10.1038/nature22394 (2017).
- 628 23 Fernandez-Leiro, R. & Scheres, S. H. Unravelling biological macromolecules with  
629 cryo-electron microscopy. *Nature* **537**, 339-346, doi:10.1038/nature19948 (2016).
- 630 24 Danev, R., Buijsse, B., Khoshouei, M., Plitzko, J. M. & Baumeister, W. Volta  
631 potential phase plate for in-focus phase contrast transmission electron microscopy.  
632 *Proc Natl Acad Sci U S A* **111**, 15635-15640, doi:10.1073/pnas.1418377111 (2014).
- 633 25 Khoshouei, M., Radjainia, M., Baumeister, W. & Danev, R. Cryo-EM structure of  
634 haemoglobin at 3.2 Å determined with the Volta phase plate. *Nat Commun* **8**, 16099,  
635 doi:10.1038/ncomms16099 (2017).
- 636 26 Nehme, R. *et al.* Mini-G proteins: Novel tools for studying GPCRs in their active  
637 conformation. *PLoS One* **12**, e0175642, doi:10.1371/journal.pone.0175642 (2017).
- 638 27 Fernandez-Leiro, R. & Scheres, S. H. W. A pipeline approach to single-particle  
639 processing in RELION. *Acta Crystallogr D Struct Biol* **73**, 496-502,  
640 doi:10.1107/S2059798316019276 (2017).
- 641 28 Zhang, K. Gctf: Real-time CTF determination and correction. *J Struct Biol* **193**, 1-12,  
642 doi:10.1016/j.jsb.2015.11.003 (2016).
- 643 29 Scheres, S. H. RELION: implementation of a Bayesian approach to cryo-EM  
644 structure determination. *J Struct Biol* **180**, 519-530, doi:10.1016/j.jsb.2012.09.006  
645 (2012).
- 646 30 Rosenthal, P. B. & Henderson, R. Optimal determination of particle orientation,  
647 absolute hand, and contrast loss in single-particle electron cryomicroscopy. *J Mol Biol*  
648 **333**, 721-745 (2003).
- 649 31 Bai, X. C., Rajendra, E., Yang, G., Shi, Y. & Scheres, S. H. Sampling the  
650 conformational space of the catalytic subunit of human gamma-secretase. *Elife* **4**,  
651 doi:10.7554/eLife.11182 (2015).
- 652 32 Tate, C. G. & Schertler, G. F. Engineering G protein-coupled receptors to facilitate  
653 their structure determination. *Curr Opin Struct Biol* **19**, 386-395,  
654 doi:10.1016/j.sbi.2009.07.004 (2009).
- 655 33 Tate, C. G. Practical considerations of membrane protein instability during  
656 purification and crystallisation. *Methods Mol Biol* **601**, 187-203, doi:10.1007/978-1-  
657 60761-344-2\_12 (2010).
- 658 34 Bartesaghi, A. *et al.* 2.2 Å resolution cryo-EM structure of beta-galactosidase in  
659 complex with a cell-permeant inhibitor. *Science* **348**, 1147-1151,  
660 doi:10.1126/science.aab1576 (2015).
- 661 35 Rucktooa, P. *et al.* Towards high throughput GPCR crystallography: In Meso soaking  
662 of Adenosine A2A Receptor crystals. *Sci Rep* **8**, 41, doi:10.1038/s41598-017-18570-  
663 w (2018).
- 664 36 Henderson, R. The potential and limitations of neutrons, electrons and X-rays for  
665 atomic resolution microscopy of unstained biological molecules. *Q Rev Biophys* **28**,  
666 171-193 (1995).

- 667 37 Vinothkumar, K. R. & Henderson, R. Single particle electron cryomicroscopy: trends,  
668 issues and future perspective. *Q Rev Biophys* **49**, e13,  
669 doi:10.1017/S0033583516000068 (2016).
- 670 38 Carpenter, B. & Tate, C. G. Expression, Purification and Crystallisation of the  
671 Adenosine A2A Receptor Bound to an Engineered Mini G Protein. *Bio Protoc* **7**,  
672 doi:10.21769/BioProtoc.2234 (2017).
- 673 39 Carpenter, B. & Tate, C. G. Expression and Purification of Mini G Proteins from  
674 Escherichia coli. *Bio Protoc* **7**, doi:10.21769/BioProtoc.2235 (2017).
- 675 40 Mastronarde, D. N. Automated electron microscope tomography using robust  
676 prediction of specimen movements. *J Struct Biol* **152**, 36-51,  
677 doi:10.1016/j.jsb.2005.07.007 (2005).
- 678 41 Kimanius, D., Forsberg, B. O., Scheres, S. H. & Lindahl, E. Accelerated cryo-EM  
679 structure determination with parallelisation using GPUs in RELION-2. *Elife* **5**,  
680 doi:10.7554/eLife.18722 (2016).
- 681 42 Zheng, S. Q. *et al.* MotionCor2: anisotropic correction of beam-induced motion for  
682 improved cryo-electron microscopy. *Nat Methods* **14**, 331-332,  
683 doi:10.1038/nmeth.4193 (2017).
- 684 43 Scheres, S. H. Semi-automated selection of cryo-EM particles in RELION-1.3. *J*  
685 *Struct Biol* **189**, 114-122, doi:10.1016/j.jsb.2014.11.010 (2015).
- 686 44 Burnley, T., Palmer, C. M. & Winn, M. Recent developments in the CCP-EM  
687 software suite. *Acta Crystallogr D Struct Biol* **73**, 469-477,  
688 doi:10.1107/S2059798317007859 (2017).
- 689 45 Murshudov, G. N. *et al.* REFMAC5 for the refinement of macromolecular crystal  
690 structures. *Acta Crystallogr D Biol Crystallogr* **67**, 355-367,  
691 doi:10.1107/S0907444911001314 (2011).
- 692 46 Emsley, P. & Cowtan, K. Coot: model-building tools for molecular graphics. *Acta*  
693 *Crystallogr D Biol Crystallogr* **60**, 2126-2132, doi:10.1107/S0907444904019158  
694 (2004).
- 695 47 Nicholls, R. A., Long, F. & Murshudov, G. N. Low-resolution refinement tools in  
696 REFMAC5. *Acta Crystallogr D Biol Crystallogr* **68**, 404-417,  
697 doi:10.1107/S090744491105606X (2012).
- 698
- 699

Figure 1

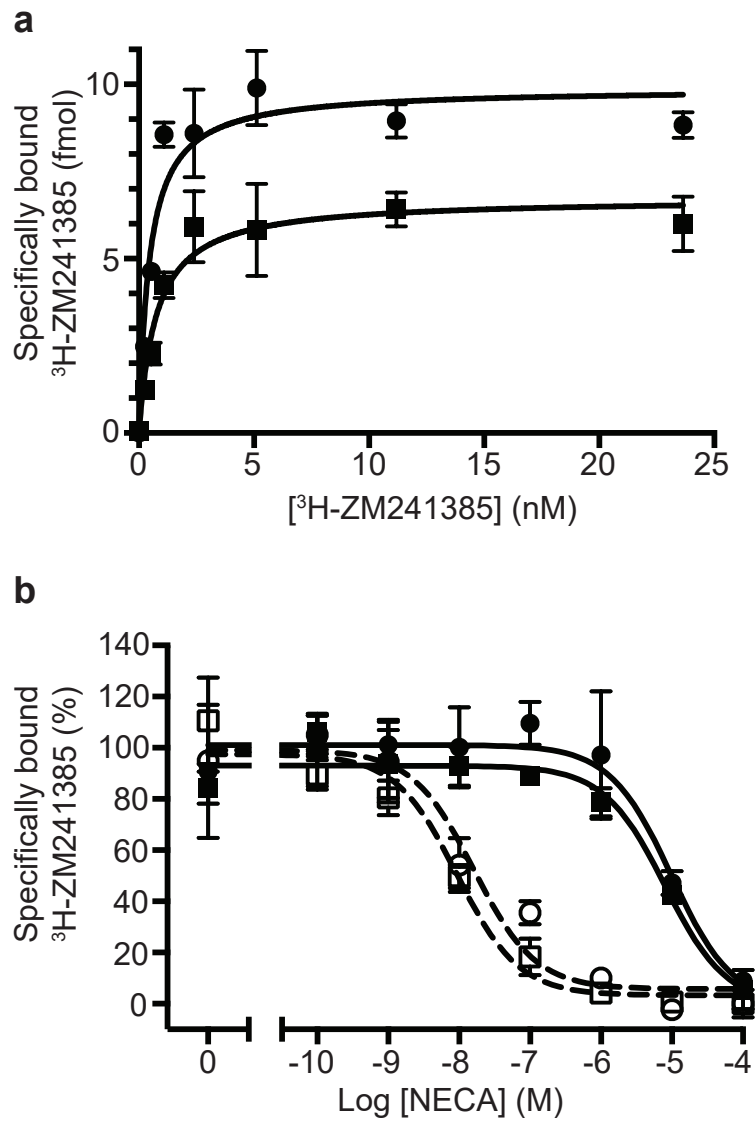

Figure 2

**a** No VPP, K2 Summit

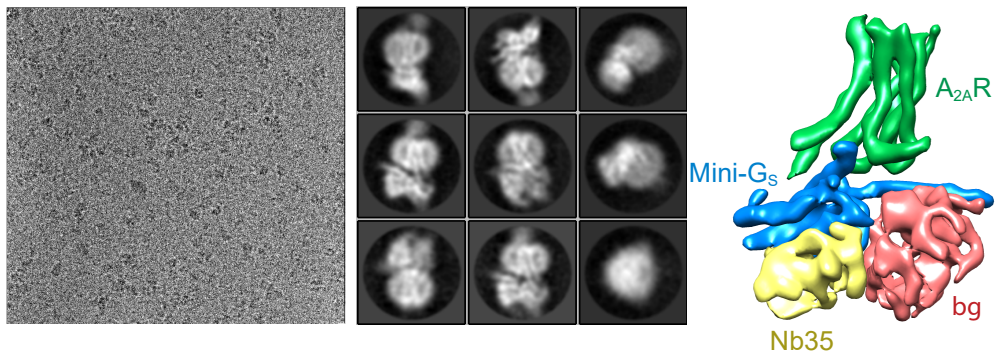

**b** VPP, K2 Summit

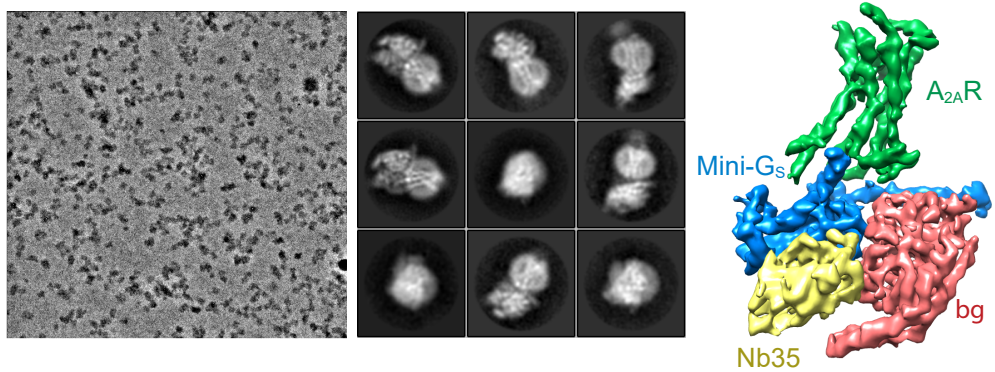

**c** VPP, Falcon III (EC mode)

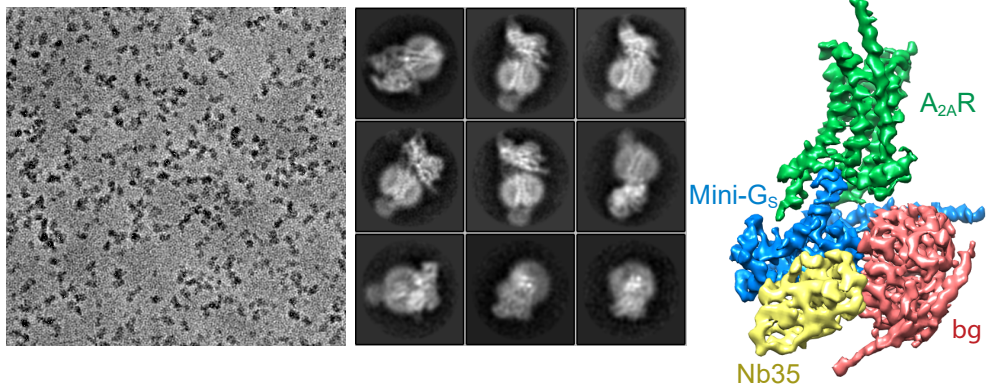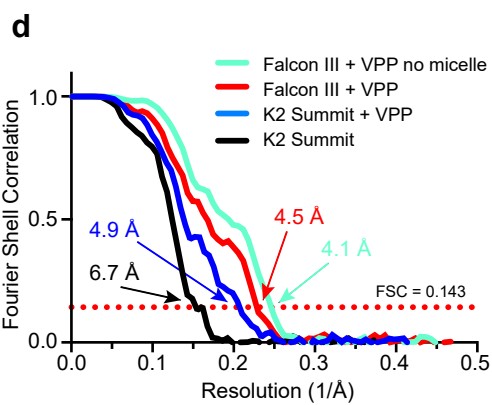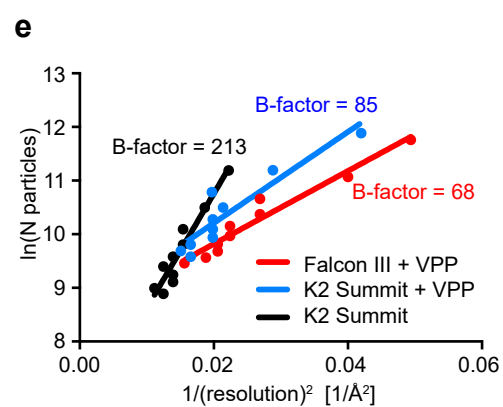

**a**

7 AVYITVELAI AVLAILGNVLCWAVWLNSNLQNVNTNYFVVS LAAADIAVGVLAIPFAITI 66

67 STGFCAACHGCLFIACFVLVLTQSSIFSL LAIAIDRYIAIRIPLRYNGLVTGTRAKGIIA 126

127 ICWVLSFAIGLTPMLGWNNCGQPK EGKAHSQGC GEGQVA CLFEDVVP MNMVFYFNFFACV 186

187 LVPLLLMLGVYLRIFLAARRQLKQMESQPLPGERARS TLQKEVHAAKSLAIIVGLFALCW 246

247 LPLHIINCFTFFCPDCSHAPLWLMYLAI VLSHTNSV VNPFIYAYRIREFRQTFRKIIRSH 306

307 VLRQQE PFKA 316

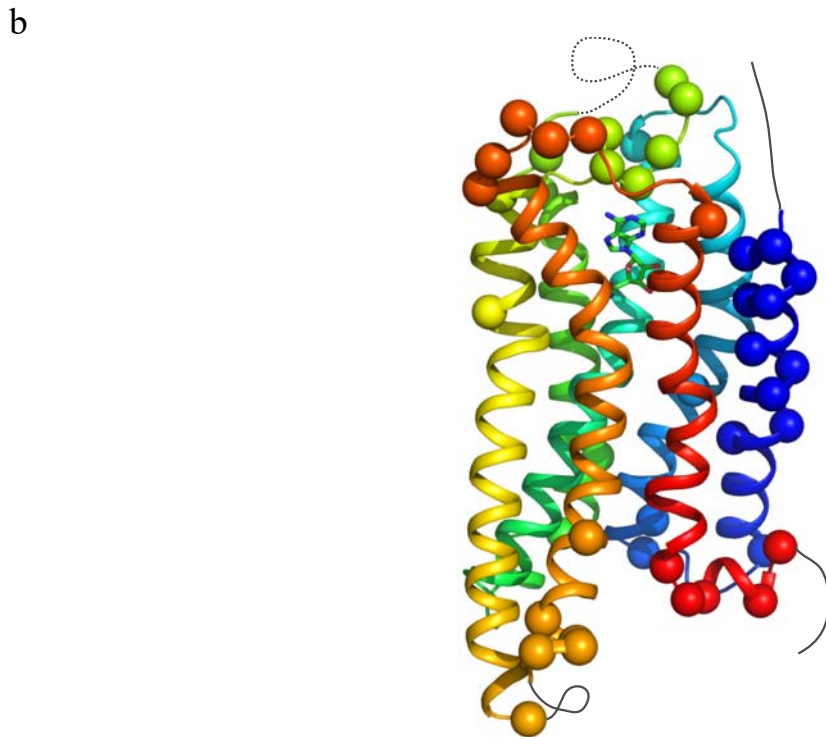

Figure 3 - Figure supplement 1. Modelling quality of the A<sub>2A</sub>R structure.

**a**, Amino acid sequence of A<sub>2A</sub>R used in the cryo-EM structure determination. Residues are coloured according to how they have been modelled: black, good density allows the side chain to be modelled; red, limited density for the side chain present and therefore the side chain has been truncated to C $\beta$ ; blue, no density observed and therefore the residue was not modelled. Regions highlighted in grey represent the transmembrane  $\alpha$ -helices and amphipathic helix 8 is highlighted in yellow. Cys residues involved in the formation of disulphide bonds are in bold. In the cryo-EM structure densities for the disulphide bonds Cys74-Cys146 and Cys77-Cys166 are observed. Densities corresponding to the disulphide bonds Cys71-Cys159 and Cys259-Cys262 are not observed in the cryo-EM data. The sequence of A<sub>2A</sub>R is from residue 8-316, with the initial Ala residue at position 7 being part of the linker between the N-terminal thioredoxin fusion and A<sub>2A</sub>R. **b**, Model of A<sub>2A</sub>R showing the C $\alpha$  positions of amino acid residues with poor density (spheres) and regions unmodelled (dotted lines).



Figure 3

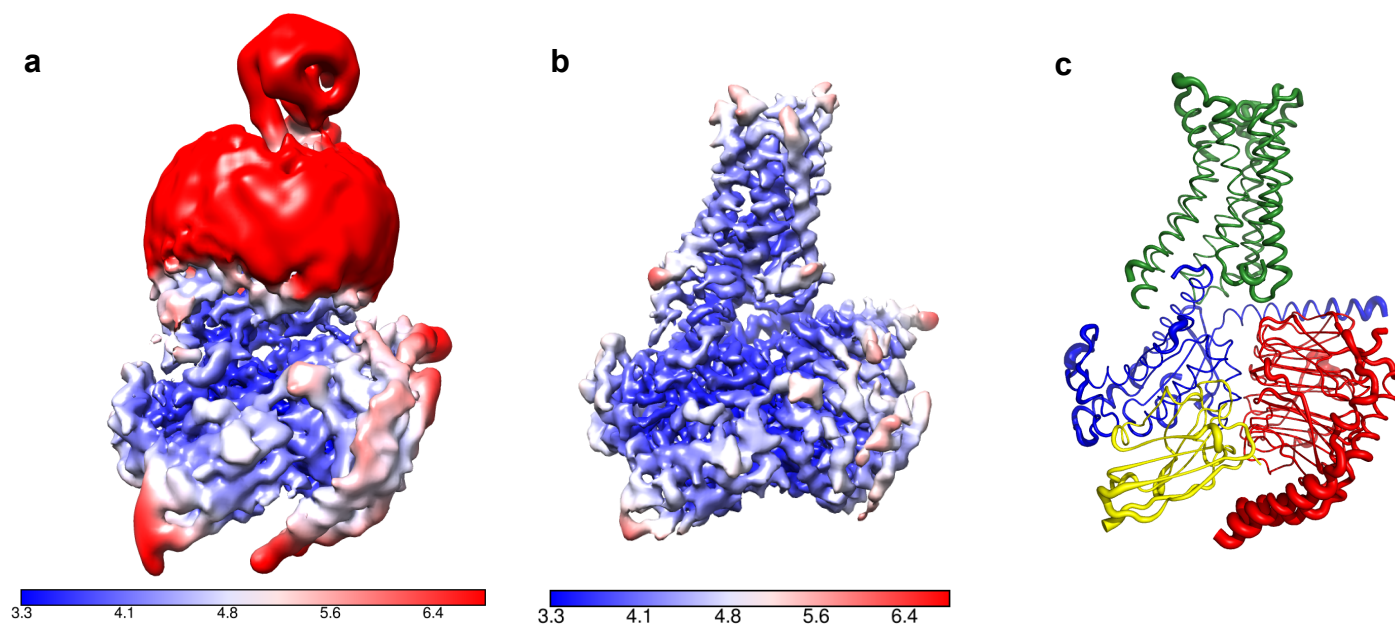

Figure 4

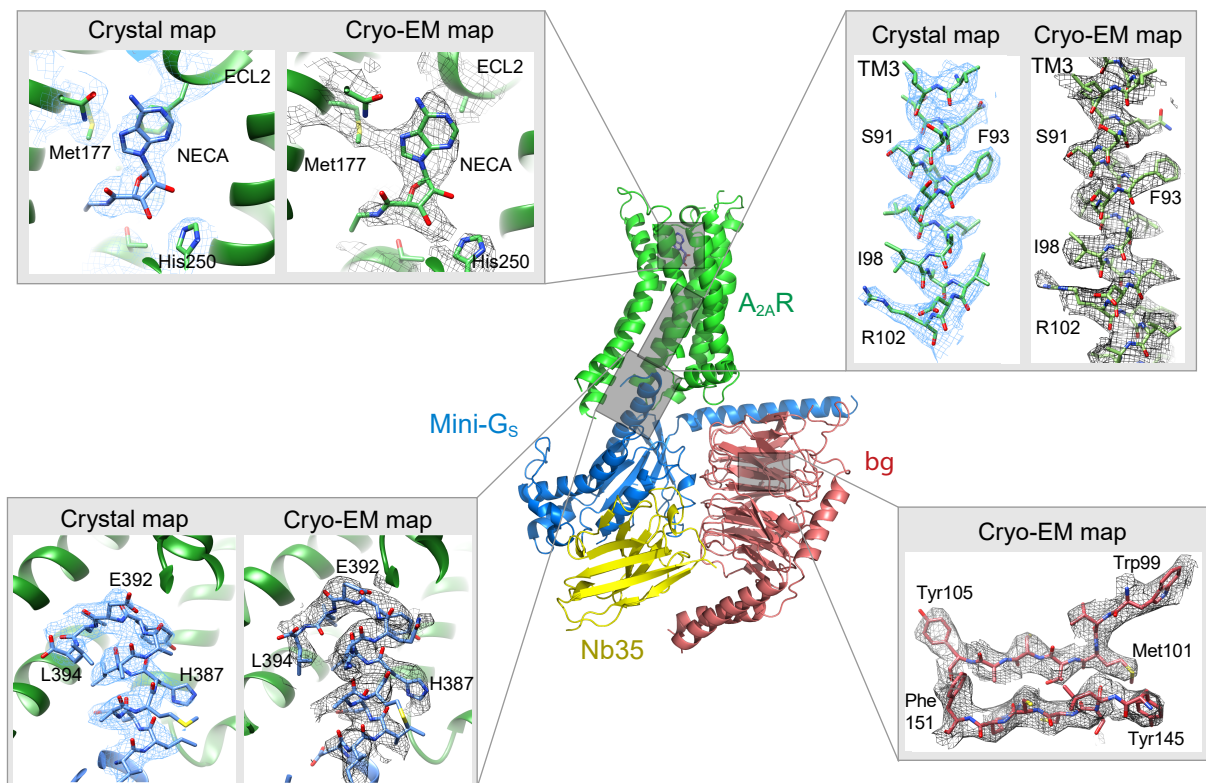

Figure 5

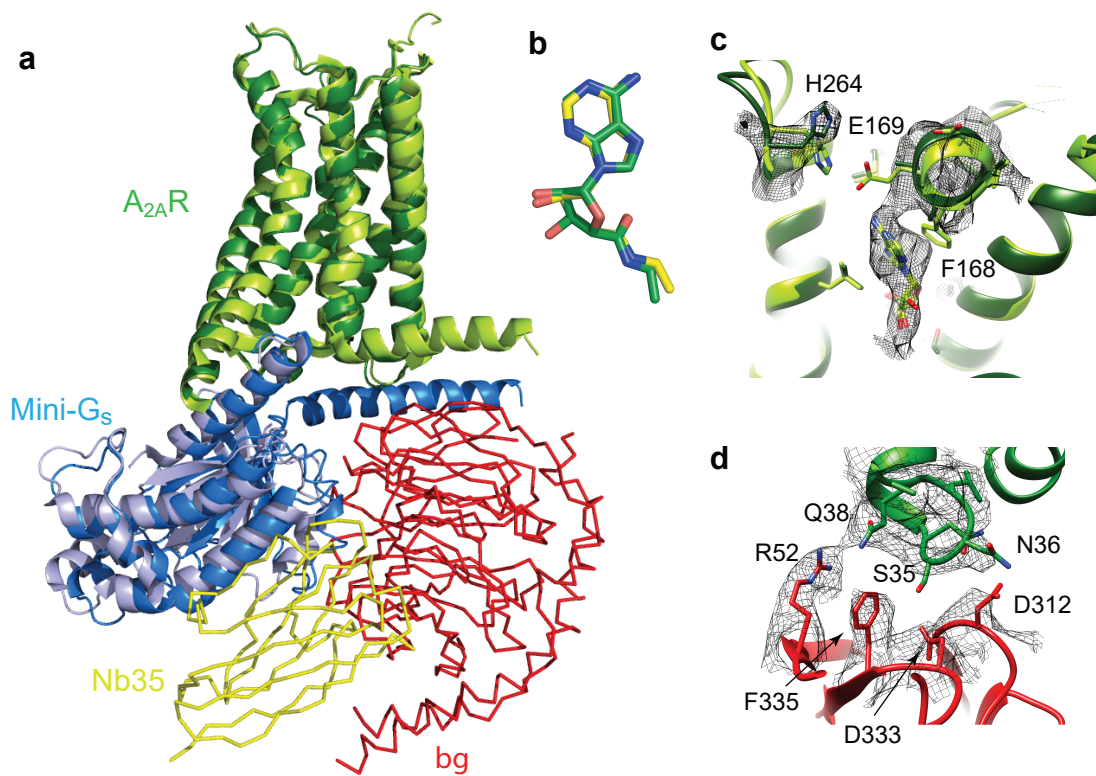

Figure 6

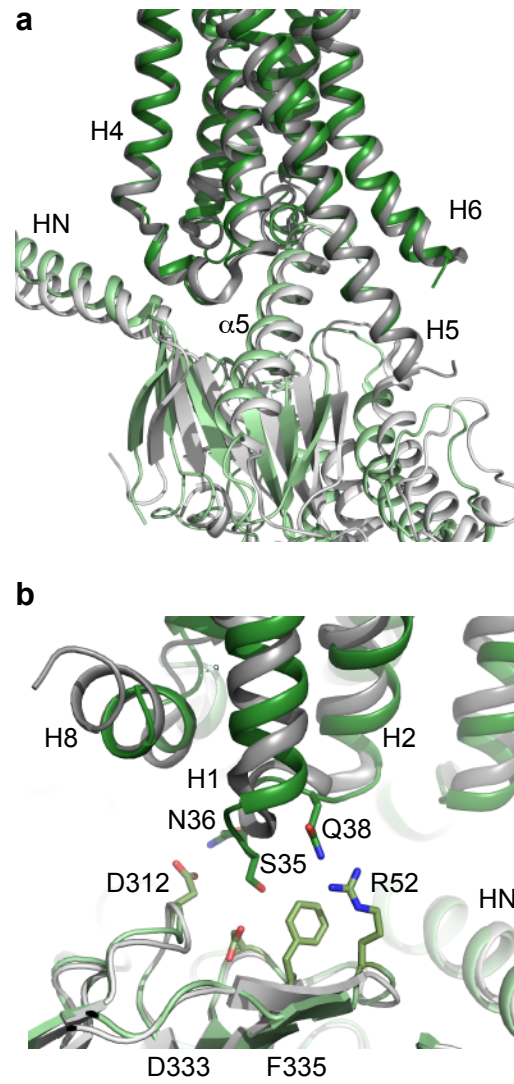

| <i>Data collection</i>                    | <i>Falcon III<br/>+ VPP</i> | <i>K2 Summit<br/>+ VPP</i> | <i>K2 Summit</i> |
|-------------------------------------------|-----------------------------|----------------------------|------------------|
| Microscope                                | Titan Krios                 | Titan Krios                | Titan Krios      |
| Particles used in final 3D refinement     | 128,002                     | 145,169                    | 72,487           |
| Pixel size (Å)                            | 1.07                        | 1.14                       | 0.66             |
| Defocus (µm)                              | -0.2 to -1.0                | -0.3 to -1.2               | -1.2 to -3.5     |
| Voltage (kV)                              | 300                         | 300                        | 300              |
| Electron dose (e/Å <sup>2</sup> )         | 30                          | 30-40                      | 50               |
| Micrographs collected                     | 827                         | 906                        | 2800             |
| <i>3D Refinement</i>                      |                             |                            |                  |
| Resolution (Å)                            | 4.11                        | 4.88                       | 6.71             |
| Map sharpening B-factor (Å <sup>2</sup> ) | -130 or -170                | -150                       | -529             |
| Fourier shell correlation criterion       | 0.143                       | 0.143                      | 0.143            |
| <i>Coordinate Refinement</i>              |                             |                            |                  |
| <i>R.m.s. deviations</i>                  |                             |                            |                  |
| Bonds (Å)                                 | 0.07                        |                            |                  |
| Angles (°)                                | 0.984                       |                            |                  |
| <i>Validation</i>                         |                             |                            |                  |
| Clashcore, all atoms                      | 0.65                        |                            |                  |
| Favoured rotamers                         | 91.12                       |                            |                  |
| Ramachandran Favoured (%)                 | 94.6                        |                            |                  |
| Ramachandran Allowed (%)                  | 4.89                        |                            |                  |
| Ramachandran Outliers (%)                 | 0.51                        |                            |                  |

Table 1. Data collection and refinement statistics
